# Supplementary material for: Mesenchymal stem cells negatively regulate CD4+ T cell activation in patients with primary Sjögren syndrome through the miRNA-125b and miRNA-155 TCR pathway
Source: PubMed Central journal article supplement — Mol Med Rep. 2020 Nov 10;23(1):43. doi: 10.3892/mmr.2020.11681 (PMC7684863; doi:10.3892/mmr.2020.11681), 2020-11-10
Supplement: Supplementary_Data1.pdf [file Supplementary_Data1.pdf]

Table SI. Reverse transcription-quantitative PCR primers for microRNAs and U6.

| Gene name     | Primer sequence (5'→3')                                                                              |
|---------------|------------------------------------------------------------------------------------------------------|
| miRNA-155-5p  | RT: GTCGTATCCAGTGCAGGGTCCGAGGTATTCGCACTGGATACGACACCCCT<br>Sense: GCCCGCTTAATGCTAATCGTGAT             |
| miRNA-7150    | RT: GTCGTATCCAGTGCAGGGTCCGAGGTATTCGCACTGGATACGACTACCTC<br>Sense: GCGGGCCTGGCAGGGGGA                  |
| miRNA-5096    | RT: GTCGTATCCAGTGCAGGGTCCGAGGTATTCGCACTGGATACGACGCCTGA<br>Sense: GCCCGC GTTTCACCATGTTGG              |
| miRNA-15a-5p  | RT: GTCGTATCCAGTGCAGGGTCCGAGGTATTCGCACTGGATACGACCACAAA<br>Sense: GCCCGC TAGCAGCACATAATGG             |
| miRNA-22-3p   | RT: GTCGTATCCAGTGCAGGGTCCGAGGTATTCGCACTGGATACGACACAGTT<br>Sense: GCCCGCAAGCTGCCAGTTGAAG              |
| miRNA-125b-5p | RT: GTCGTATCCAGTGCAGGGTCCGAGGTATTCGCACTGGATACGACTCACAA<br>Sense: GCCCGCTCCCTGAGACCCTAAC              |
| miRNA-181a    | RT: GTCGTATCCAGTGCAGGGTCCGAGGTATTCGCACTGGATACGACTCAC<br>Sense: GCCCGGAACATTCAACG                     |
| miRNA-140-3p  | RT: GTCGTATCCAGTGCAGGGTCCGAGGTATTCGCACTGGATACGACCCGTGG<br>Sense: GCGGGCTACCACAGGGTAGAA               |
| miRNA<br>U6   | Universal antisense: GTGCAGGGTCCGAGGT<br>Sense: CTCGCTTCGGCAGCACA<br>Antisense: AACGCTTCACGAATTTGCGT |

RT, reverse transcription; miRNA, microRNA.
